# Supplementary material for: Vaccine-induced immune thrombotic thrombocytopenia post COVID-19 booster vaccination in Brazil: a case series
Source: PubMed Central journal article supplement — Res Pract Thromb Haemost. 2023 Oct 31;7(8):102243. doi: 10.1016/j.rpth.2023.102243 (PMC10772875; doi:10.1016/j.rpth.2023.102243), 2023-10-31
Supplement: mmc1.pdf [file mmc1.pdf]

**Supplementary Table 1.** Demographic and clinical parameters of the cases

| Case number | Vaccine     | Case entry (date) | Age (years) | Sex    | Dose   | Date of symptoms | Interval between vaccine/ symptoms (days) | Interval between symptoms/ hospital admission (days) | Platelet lowest value | Higher D-dimer value | Thrombosis topography                                                                          | Anti-PF4 Elisa | Outcome | Brighton Classification TTS | Experts Haematologists panel UK |
|-------------|-------------|-------------------|-------------|--------|--------|------------------|-------------------------------------------|------------------------------------------------------|-----------------------|----------------------|------------------------------------------------------------------------------------------------|----------------|---------|-----------------------------|---------------------------------|
| 1           | ChAdOx1     | 2022-04-28        | 28          | Male   | Third  | 2022-03-05       | 2                                         | 12                                                   | 123                   | 500                  | Right external iliac vein                                                                      | Negative       | Alive   | Level 1                     | Unlikely                        |
| 2           | ChAdOx1     | 2022-07-15        | 32          | Male   | Fourth | 2022-07-02       | 7                                         | 8                                                    | 36,000                | 10,636               | Inespecific CNS thrombosis with intracerebral hemorrhage                                       | Positive       | Alive   | Level 1                     | Definite                        |
| 3           | Ad26.COVS.S | NI                | 31          | Male   | Third  | 2022-04-20       | 16                                        | 0                                                    | 41,000                | 20,000               | Portal vein                                                                                    | Positive       | Alive   | Level 1                     | Definite                        |
| 4           | ChAdOx1     | 2022-08-19        | 41          | Male   | Fourth | 2022-08-07       | 12                                        | 1                                                    | 98,000                | 5,834                | CVST                                                                                           | Positive       | Alive   | Level 1                     | Definite                        |
| 5           | ChAdOx1     | 2022-03-09        | 34          | Male   | Third  | 2022-02-20       | 6                                         | 4                                                    | 19,800                | 20,000               | CVST                                                                                           | Positive       | Alive   | Level 1                     | Definite                        |
| 6           | ChAdOx1     | 2022-05-19        | 21          | Male   | Third  | 2022-05-13       | 7                                         | 3                                                    | 1,337                 | 61,800               | Hepatic and left renal vein                                                                    | Positive       | Alive   | Level 1                     | Definite                        |
| 7           | BNT162b2    | 2021-11-24        | 43          | Female | Third  | 2021-10-17       | 3                                         | NI                                                   | 50,000                | 75,000               | CNS, renal vein and splancnic                                                                  | Negative       | NI      | Level 1                     | Probable                        |
| 8           | ChAdOx1     | 2022-09-13        | 34          | Female | Fourth | 2022-08-21       | 12                                        | 3                                                    | 33,000                | NI                   | CVST with intracerebral hemorrhage                                                             | NA             | Death   | Level 1                     | Possible                        |
| 9           | ChAdOx1     | 2021-11-24        | 40          | Female | Fourth | 2021-10-17       | 16                                        | 1                                                    | 40                    | 690                  | Intracardiac thrombosis, suspected PE                                                          | NA             | Death   | Level 1                     | Unlikely                        |
| 10          | ChAdOx1     | 2022-08-04        | 38          | Female | Fourth | 2022-06-30       | 8                                         | 3                                                    | 4,850                 | 7,600                | PE, intracerebral hemorrhage                                                                   | Positive       | Death   | Level 1                     | Definite                        |
| 11          | ChAdOx1     | 2022-08-04        | 37          | Female | Fourth | 2022-06-30       | 8                                         | 1                                                    | 1,100                 | NI                   | Arterial cerebral thrombosis with subarachnoid hemorrhage and right subclavian vein thrombosis | Positive       | Death   | Level 1                     | Probable                        |
| 12          | ChAdOx1     | 2022-07-19        | 47          | Female | Fourth | 2022-06-28       | 12                                        | 9                                                    | 11,000                | 11,235               | CVST with intracranial hemorrhage                                                              | Positive       | Death   | Level 1                     | Definite                        |
| 13          | ChAdOx1     | 2022-09-13        | 39          | Female | Fourth | 2022-08-11       | 8                                         | 2                                                    | 32,000                | 20,000               | CVST with intracerebral hemorrhage                                                             | Positive       | Death   | Level 1                     | Definite                        |
| 14          | ChAdOx1     | 2022-06-20        | 28          | Male   | Third  | 2022-06-09       | 6                                         | 1                                                    | 64,000                | NI                   | CVST with intracerebral hemorrhage                                                             | Positive       | Death   | Level 1                     | Definite                        |
| 15          | ChAdOx1     | 2022-04-29        | 22          | Female | Third  | 2022-04-14       | 10                                        | 0                                                    | 11,000                | 12,000               | DVT, PE, arterial cerebral thrombosis, CVST with intracerebral hemorrhage                      | Positive       | Death   | Level 1                     | Definite                        |

Abbreviations: CNS- Central nervous system; CVST- Central venous sinus thrombosis; PE- Pulmonary embolism; DVT- Deep venous thrombosis; NA- Not available; NI- Not informed; TTS- Thrombosis with thrombocytopenia syndrome ; UK- United Kingdom
